# Supplementary material for: Resveratrol Ameliorates the Malignant Progression of Pancreatic Cancer by Inhibiting Hypoxia-induced Pancreatic Stellate Cell Activation
Source: PubMed Central journal article supplement — Cell Transplant. 2020 May 28;29:0963689720929987. doi: 10.1177/0963689720929987 (PMC7563930; doi:10.1177/0963689720929987), 2020-05-28
Supplement: Table_S1.pdf [file Table_S1.pdf]

1

**Table S1.** Primers sequences for real-time PCR analysis.

| <b>Primer Sequences</b> |                                                                                |
|-------------------------|--------------------------------------------------------------------------------|
| VEGF-A                  | Forward: 5'-TTCTGCTGTCTTGGGTGCAT-3'<br>Reverse: 5'-TGTCCACCAGGGTCTCGATT-3'     |
| IL-6                    | Forward: 5'-AGTTCCTGCAGTCCAGCCTGAG-3'<br>Reverse: 5'-TCAAAGTGCATAGCCACTTTCC-3' |
| SDF1                    | Forward: 5'-GTGTCACCTGGCGACACGTAG-3'<br>Reverse: 5'-TCCCATCCCACAGAGAGAAG-3'    |
| GAPDH                   | Forward: 5'-ACCACAGTCCATGCCATCAC-3'<br>Reverse: 5'-TCCACCACCCTGTTGCTGAT-3'     |

2
