# Supplementary material for: Resveratrol Ameliorates the Malignant Progression of Pancreatic Cancer by Inhibiting Hypoxia-induced Pancreatic Stellate Cell Activation
Source: PubMed Central journal article supplement — Cell Transplant. 2020 May 28;29:0963689720929987. doi: 10.1177/0963689720929987 (PMC7563930; doi:10.1177/0963689720929987), 2020-05-28
Supplement: Table_S2.pdf [file Table_S2.pdf]

1

**Table S2.** siRNA sequences.

| <b>Genes</b>     | <b>Primer Sequences</b>                                                      |
|------------------|------------------------------------------------------------------------------|
| siControl        | sense: 5'-UUCUCCGAACGUGUCACGUTT-3'<br>antisense: 5'-ACGUGACACGUUCGGAGAATT-3' |
| siHIF-1 $\alpha$ | sense: 5'-UUUAAUUCAUCAGUGGUGGTT-3'<br>antisense: 5'-CCACCACUGAUGAAUUAATT-3'  |

2

3
